# Supplementary material for: Direct Evidence of Microbial Sunscreen Production by Scum‐Forming Cyanobacteria in the Baltic Sea
Source: PubMed Central journal article supplement (PMC11738650; doi:10.1111/1758-2229.70056), 2025-01-16
Supplement: EMI4-17-e70056-s001.pdf [file EMI4-17-e70056-s001.pdf]

**Table S1.** Bloom samples collected in 2021 and 2022. Sample number, sampling location, total relative abundance of MAAs, Chl A levels, dry weight per methanol extraction and genera observed are reported in the table.

| Bloom Sample No. | Location                 | Date      | Coordinates (DMS)            | LCMS ID | MAA (Total) | Chl a (654-656 nm) | MAA/Chl a | Dry weight (mg) | Genera observed                                                                               |
|------------------|--------------------------|-----------|------------------------------|---------|-------------|--------------------|-----------|-----------------|-----------------------------------------------------------------------------------------------|
| 1                | Öbyviken, Tammisaari     | 21.6.2021 | 59°55'28.2"N<br>23°09'32.7"E | G111    | 0           | 697                | 0         | 5               | cf <i>Limnoraphis robusta</i>                                                                 |
| 2                | Munkkiniemi, Helsinki    | 30.6.2021 | 60°12'01.1"N<br>24°51'26.3"E | G112    | 724         | 1361               | 0,5319618 | 5               | cf <i>Aphanizomenon flos-aquae</i> , cf <i>Dolichospermum</i>                                 |
| 3                | Koivusaari, Helsinki     | 1.7.2021  | 60°09'42.6"N<br>24°51'16.5"E | G113    | 1468        | 3442               | 0,4264962 | 5               | cf <i>Aphanizomenon flos-aquae</i> , cd <i>Dolichospermum</i>                                 |
| 4                | Laajalahti, Espoo        | 8.7.2021  | 60°12'21.0"N<br>24°50'16.0"E | G129    | 140691      | 61415              | 2,2908247 | 5               | cf <i>Aphanizomenon flos-aquae</i> , cf <i>Dolichospermum</i>                                 |
| 5                | Eningsholmintie, Kustavi | 2.8.2021  | 60°30'12.7"N<br>21°17'10.4"E | G153    | 28441       | 19606              | 1,4506274 | 5               | cf <i>Dolichospermum</i> , cf <i>Aphanizomenon flos-aquae</i>                                 |
| 6                | Lyökki, Uusikaupunki     | 2.8.2021  | 60°51'36.2"N<br>21°11'22.2"E | G147    | 35822       | 18199              | 1,9683499 | 5               | cf <i>Nodularia spumigena</i> , cf <i>Dolichospermum</i> , cf <i>Aphanizomenon flos-aquae</i> |
| 7                | Taivassalo               | 2.8.2021  | 60°33'44.6"N<br>21°32'09.7"E | G148    | 22483       | 27608              | 0,8143654 | 5               | cf <i>Nodularia spumigena</i> , cf <i>Dolichospermum</i> , cf <i>Aphanizomenon flos-aquae</i> |
| 8                | Soukka, Espoo            | 3.8.2021  | 60°08'11.0"N<br>24°39'06.3"E | G149    | 25399       | 22443              | 1,1317114 | 5               | cf <i>Dolichospermum</i> , cf <i>Aphanizomenon flos-aquae</i>                                 |
| 9                | Westend beach, Espoo     | 9.8.2021  | 60°10'07.3"N<br>24°48'37.2"E | G154    | 47045       | 30098              | 1,5630607 | 5               | cf <i>Dolichospermum</i> , cf <i>Aphanizomenon flos-aquae</i>                                 |
| 10               | Matinkylä beach          | 9.8.2021  | 60°09'03.0"N<br>24°45'22.4"E | G155    | 50955       | 18973              | 2,6856586 | 5               | cf <i>Dolichospermum</i> , cf <i>Aphanizomenon flos-aquae</i>                                 |
| 11               | Aurinkolahti beach       | 9.8.2021  | 60°12'07.4"N<br>25°09'35.2"E | G156    | 26986       | 13936              | 1,9364237 | 5               | cf <i>Dolichospermum</i> , cf <i>Nodularia spumigena</i>                                      |
| 12               | Laajasalo beach          | 9.8.2021  | 60°10'37.6"N<br>25°03'50.4"E | G157    | 25075       | 11018              | 2,2758214 | 5               | cf <i>Dolichospermum</i> , cf <i>Aphanizomenon flos-aquae</i> , cf <i>Nodularia spumigena</i> |
| 13               | Suomenlinna west         | 12.8.2021 | 60°08'42.3"N<br>24°58'47.6"E | G158    | 11849       | 19722              | 0,6008011 | 5               | cf <i>Dolichospermum</i> , cf <i>Aphanizomenon flos-aquae</i> , cf <i>Nodularia spumigena</i> |
| 14               | Suomenlinna east         | 12.8.2021 | 60°08'28.4"N<br>24°59'13.8"E | G159    | 12964       | 30397              | 0,4264895 | 5               | cf <i>Dolichospermum</i> , cf <i>Nodularia spumigena</i>                                      |
| 15               | Munkkiniemi beach        | 12.8.2021 | 60°09'15.0"N<br>24°56'37.2"E | G160    | 46327       | 20365              | 2,2748343 | 5               | cf <i>Dolichospermum</i>                                                                      |
| 16               | Kaivopuiston ranta       | 12.8.2021 | 60°09'15.0"N<br>24°56'37.2"E | G161    | 9907        | 17047              | 0,581158  | 5               | cf <i>Dolichospermum</i> , cf <i>Aphanizomenon flos-aquae</i> , cf <i>Nodularia spumigena</i> |
| 17               | Norrbyviken, Parainen    | 24.8.2021 | 60°18'48.4"N<br>22°17'51.1"E | G165    | 40001       | 65240              | 0,6131361 | 5               | cf <i>Nodularia spumigena</i> , cf <i>Aphanizomenon flos-aquae</i>                            |
| 18               | Naantali marina          | 24.8.2021 | 60°28'11.1"N<br>22°00'56.7"E | G166    | 47191       | 30936              | 1,5254396 | 5               | cf <i>Nodularia spumigena</i> , cf <i>Aphanizomenon flos-aquae</i> , cf <i>Dolichospermum</i> |
| 19               | Kvarnholm, Parainen      | 24.8.2021 | 60°19'21.8"N<br>22°20'31.1"E | G167    | 40099       | 70723              | 0,5669867 | 5               | cf <i>Nodularia spumigena</i>                                                                 |

|    |                              |           |                              |      |       |       |           |      |                                                                                                  |
|----|------------------------------|-----------|------------------------------|------|-------|-------|-----------|------|--------------------------------------------------------------------------------------------------|
| 20 | Hiirsalmi, Piikkiö,<br>Turku | 24.8.2021 | 60°24'07.7"N<br>22°29'18.0"E | G168 | 35691 | 34209 | 1,0433219 | 5    | cf <i>Nodularia spumigena</i> , cf <i>Aphanizomenon flos-aquae</i> ,<br>cf <i>Dolichospermum</i> |
| 21 | Rajasaari                    | 5.7.2022  | 60°10'57.7"N<br>24°54'37.0"E | GG01 | 1522  | 1785  | 0,8526611 | 5,4  | cf <i>Nodularia</i> , cf <i>Anabaena</i> , cf <i>Aphanizomenon</i>                               |
| 22 | Rajasaari                    | 8.7.2022  | 60°10'50.3"N<br>24°54'29.9"E | GG02 | 2246  | 2873  | 0,7817612 | 5,5  | cf <i>Nodularia</i> , cf <i>Anabaena</i> , cf <i>Aphanizomenon</i>                               |
| 23 | Munkkiniemi                  | 11.7.2022 | 60°12'03.0"N<br>24°51'24.4"E | GG03 | 1     | 89    | 0,011236  | 4,5  | cf <i>Anabaena</i> , cf <i>Dolichospermum</i> , cf <i>Aphanizomenon</i>                          |
| 24 | Rajasaari                    | 11.7.2022 | 60°10'52.1"N<br>24°54'33.1"E | GG04 | 527   | 3590  | 0,1467967 | 5    | cf <i>Nodularia</i> , cf <i>Anabaena</i> , cf <i>Aphanizomenon</i>                               |
| 25 | Puotila                      | 11.7.2022 | 60°12'22.0"N<br>25°06'09.3"E | GG05 | 120   | 1847  | 0,0649702 | 5,1  | cf <i>Nodularia</i> , cf <i>Anabaena</i> , cf <i>Aphanizomenon</i>                               |
| 26 | Puotila beach                | 11.7.2022 | 60°12'30.7"N<br>25°06'32.7"E | GG06 | 16    | 2016  | 0,0079365 | 5    | cf <i>Anabaena</i> , cf <i>Dolichospermum</i> , cf <i>Aphanizomenon</i>                          |
| 27 | Munkkiniemi                  | 11.7.2022 | 60°12'12.3"N<br>24°51'06.8"E | GG07 | 0     | 1378  | 0         | 4,8  | cf <i>Anabaena</i> , cf <i>Dolichospermum</i> , cf <i>Aphanizomenon</i>                          |
| 28 | Klobben                      | 18.7.2022 | 60°08'06.2"N<br>24°38'52.3"E | GG08 | 93    | 1479  | 0,0628803 | 5,1  | cf <i>Anabaena</i> , cf <i>Dolichospermum</i> , cf <i>Aphanizomenon</i>                          |
| 29 | Munkkiniemi                  | 19.7.2022 | 60°12'03.0"N<br>24°51'24.4"E | GG09 | 821   | 3488  | 0,2353784 | 5,2  | cf <i>Anabaena</i> , cf <i>Dolichospermum</i> , cf <i>Aphanizomenon</i> , cf<br><i>Nodularia</i> |
| 30 | Rajasaari                    | 28.7.2022 | 60°10'59.1"N<br>24°54'35.7"E | GG20 | 7027  | 4239  | 1,6577023 | 5,9  | cf <i>Anabaena</i> , cf <i>Dolichospermum</i> , cf <i>Aphanizomenon</i> , cf<br><i>Nodularia</i> |
| 31 | Laajasalo beach              | 1.8.2022  | 60°10'34.9"N<br>25°03'48.6"E | GG22 | 737   | 1495  | 0,4929766 | 6,08 | cf <i>Dolichospermum</i> , cf <i>Aphanizomenon</i> , cf <i>Nodularia</i>                         |
| 32 | Lapinlahti                   | 2.8.2022  | 60°10'05.2"N<br>24°54'54.1"E | GG24 | 3909  | 3490  | 1,1200573 | 5,07 | cf <i>Dolichospermum</i> , cf <i>Aphanizomenon</i> , cf <i>Nodularia</i>                         |
| 33 | Rajasaari                    | 5.8.2022  | 60°10'57.6"N<br>24°54'37.5"E | GG35 | 1628  | 1454  | 1,1196699 | 5,3  | cf <i>Dolichospermum</i> , cf <i>Aphanizomenon</i> , cf <i>Nodularia</i>                         |
| 34 | Pikisaari beach              | 9.8.2022  | 60°10'57.6"N<br>24°54'37.5"E | GG41 | 2021  | 1952  | 1,0353484 | 6    | cf <i>Aphanizomenon</i>                                                                          |
| 35 | Vesiläntie                   | 9.8.2022  | 60°35'11.8"N<br>21°49'26.4"E | GG50 | 518   | 1717  | 0,301689  | 6,7  | cf <i>Aphanizomenon</i> , cf <i>Nodularia</i> , cf <i>Anabena</i> , cf<br><i>Dolichospermum</i>  |
| 36 | Kultaranta                   | 9.8.2022  | 60°27'47.4"N<br>22°00'12.2"E | GG52 | 1906  | 5555  | 0,3431143 | 5,9  | cf <i>Nodularia</i> , cf <i>Anabaena</i> , cf <i>Dolichospermum</i>                              |
| 37 | Laajasalo beach              | 10.8.2022 | 60°10'34.9"N<br>25°03'48.6"E | GG57 | 990   | 1719  | 0,5759162 | 5,5  | cf <i>Aphanizomenon</i> , cf <i>Nodularia</i> , cf <i>Anabena</i> , cf<br><i>Dolichospermum</i>  |
| 38 | Marjaniemi Beach             | 10.8.2022 | 60°11'54.7"N<br>25°04'34.8"E | GG62 | 714   | 1994  | 0,3580742 | 5,4  | cf <i>Aphanizomenon</i> , cf <i>Nodularia</i> , cf <i>Anabena</i> , cf<br><i>Dolichospermum</i>  |
| 39 | Rajasaari (Boat club)        | 10.8.2022 | 60°10'52.1"N<br>24°54'33.1"E | GG77 | 116   | 2226  | 0,0521114 | 5,7  | cf <i>Aphanizomenon</i> , cf <i>Nodularia</i> , cf <i>Anabena</i> , cf<br><i>Dolichospermum</i>  |
| 40 | Rajasaari                    | 10.8.2022 | 60°10'57.7"N<br>24°54'37.4"E | GG78 | 515   | 3582  | 0,1437744 | 5,5  | cf <i>Aphanizomenon</i> , cf <i>Nodularia</i> , cf <i>Anabena</i> , cf<br><i>Dolichospermum</i>  |
| 41 | Rajasaari                    | 10.8.2022 | 60°10'57.7"N<br>24°54'37.4"E | GG79 | 1146  | 5817  | 0,1970088 | 6,7  | cf <i>Dolichospermum</i> , cf <i>Aphanizomenon</i> , cf <i>Nodularia</i>                         |

|    |                              |           |                              |       |      |      |           |     |                                                                            |
|----|------------------------------|-----------|------------------------------|-------|------|------|-----------|-----|----------------------------------------------------------------------------|
| 42 | Rajasaari (Boat club)        | 12.8.2022 | 60°10'52.1"N<br>24°54'29.3"E | GG80  | 1090 | 6150 | 0,1772358 | 6,5 | cf <i>Dolichospermum</i> , cf <i>Aphanizomenon</i> , cf <i>Nodularia</i>   |
| 43 | Rajasaari (Boat club)        | 12.8.2022 | 60°10'52.5"N<br>24°54'34.0"E | GG82  | 897  | 4922 | 0,182243  | 5,7 | cf <i>Dolichospermum</i> , cf <i>Aphanizomenon</i> , cf <i>Nodularia</i>   |
| 44 | Kirjalansaari, Parainen      | 16.8.2022 | 60°19'42.6"N<br>22°23'21.1"E | GG91  | 1035 | 3434 | 0,3013978 | 5,6 | cf <i>Dolichospermum</i> , cf <i>Aphanizomenon</i> , cf <i>Nodularia</i>   |
| 45 | Hovirinta marina,<br>Kaarina | 16.8.2022 | 60°23'43.7"N<br>22°22'19.6"E | GG96  | 2663 | 4222 | 0,6307437 | 5,5 | cf <i>Nodularia</i> , cf <i>Dolichospermum</i> , cf <i>Aphanizomenon</i>   |
| 46 | Harvaluodon uimaranta        | 16.8.2022 | 60°22'14.7"N<br>22°30'58.8"E | GG99  | 1008 | 3452 | 0,2920046 | 5,8 | cf <i>Nodularia</i> , cf <i>Dolichospermum</i> , cf <i>Aphanizomenon</i> , |
| 47 | Katajanokka                  | 18.8.2022 | 60°10'09.2"N<br>24°57'50.4"E | GG106 | 1149 | 4549 | 0,252583  | 5,4 | cf <i>Aphanizomenon</i> , cf <i>Nodularia</i> , cf <i>Dolichospermum</i>   |
| 48 | Katajanokka                  | 18.8.2022 | 60°10'08.9"N<br>24°57'57.4"E | GG108 | 987  | 4815 | 0,2049844 | 5,5 | cf <i>Aphanizomenon</i> , cf <i>Nodularia</i> , cf <i>Dolichospermum</i>   |
| 49 | Ruoholahti                   | 18.8.2022 | 60°09'42.5"N<br>24°54'49.6"E | GG111 | 288  | 2407 | 0,119651  | 5,5 | cf <i>Dolichospermum</i> , cf <i>Aphanizomenon</i> , cf <i>Nodularia</i>   |
| 50 | Otaniemi                     | 18.8.2022 | 60°11'03.0"N<br>24°50'16.9"E | GG115 | 445  | 4689 | 0,094903  | 5,1 | cf <i>Dolichospermum</i> , cf <i>Nodularia</i>                             |
| 51 | Otaniemi                     | 24.8.2022 | 60°11'10.7"N<br>24°50'17.2"E | GG125 | 307  | 5318 | 0,0577285 | 4,9 | Cells broken, fragments hard to identify                                   |
| 52 | Siltatie, Kemiö              | 25.8.2022 | 60°09'13.4"N<br>22°36'50.5"E | GG127 | 6    | 123  | 0,0487805 | 4,9 | Cells broken, fragments hard to identify                                   |
| 53 | Dragsfjärd                   | 25.8.2022 | 60°04'24.3"N<br>22°28'02.3"E | GG143 | 1317 | 2555 | 0,5154599 | 5,1 | cf <i>Dolichospermum</i> , cf <i>Aphanizomenon</i>                         |
| 54 | Dalsbruk                     | 25.8.2022 | 60°01'10.9"N<br>22°30'13.0"E | GG136 | 19   | 1554 | 0,0122265 | 4,9 | cf <i>Nodularia</i> , other broken cell fragments                          |
| 55 | Sundvik                      | 25.8.2022 | 60°03'48.2"N<br>22°46'02.5"E | GG138 | 623  | 3560 | 0,175     | 5   | cf <i>Aphanizomenon</i> , cf <i>Nodularia</i> , cf <i>Dolichospermum</i>   |
| 56 | Finby                        | 25.8.2022 | 60°06'48.8"N<br>22°57'24.9"E | GG140 | 1660 | 6002 | 0,2765745 | 4,9 | cf <i>Nodularia</i> , other broken cell fragments: cf <i>Aphanizomenon</i> |
| 57 | Laajalahti                   | 24.8.2022 | 60°12'11.0"N<br>24°49'45.2"E | GG144 | 119  | 1409 | 0,0844571 | 5,6 | cf <i>Aphanizomenon</i> , cf <i>Nodularia</i>                              |
| 58 | Merimasku                    | 30.8.2022 | 60°28'58.2"N<br>21°52'15.5"E | GG147 | 62   | 1241 | 0,0499597 | 5,4 | cf <i>Aphanizomenon</i> , cf <i>Dolichospermum</i> , cf <i>Nodularia</i>   |
| 59 | Naantali                     | 30.8.2022 | 60°28'11.3"N<br>22°00'56.3"E | GG151 | 10   | 233  | 0,0429185 | 5,2 | cf <i>Aphanizomenon</i> , cf <i>Dolichospermum</i>                         |

**Table S2.** Strain number, origin, and assembly and descriptive statistics for the draft and complete genomes of *Anabaena*, *Dolichospermum* and *Aphanizomenon* used in the phylogenomic analysis.

| Strain                                       | Location      | Assembly        | Completeness (%) | Contamination (%) | Contigs | Largest contig | Total length | GC (%) | N50     | N75     | L50 | L75 | # N's per 100 kbp |
|----------------------------------------------|---------------|-----------------|------------------|-------------------|---------|----------------|--------------|--------|---------|---------|-----|-----|-------------------|
| <i>Anabaena aphanizomenioides</i> LEGE 00250 | Europe        | GCA_015207835_1 | 98.78            | 0.22              | 399     | 112128         | 5585676      | 37.59  | 23683   | 13073   | 67  | 147 | 0                 |
| <i>Anabaena azotica</i> FACHB119             | Asia          | GCA_014697625_1 | 99.56            | 0.89              | 122     | 311233         | 8048170      | 41.34  | 127363  | 79827   | 21  | 42  | 0                 |
| <i>Anabaena catenula</i> FACHB362            | Asia          | GCA_014698735_1 | 99.89            | 0.00              | 109     | 435731         | 6234385      | 39.37  | 120473  | 57818   | 18  | 36  | 0                 |
| <i>Anabaena cylindrica</i> FACHB170          | Asia          | GCA_014696775_1 | 99.19            | 0.00              | 71      | 723181         | 7003498      | 41.26  | 208506  | 96332   | 10  | 21  | 0                 |
| <i>Anabaena cylindrica</i> FACHB243          | Asia          | GCA_014697335_1 | 99.44            | 0.00              | 96      | 418195         | 6890297      | 38.77  | 143668  | 78453   | 16  | 31  | 0                 |
| <i>Anabaena cylindrica</i> FACHB318          | Asia          | GCA_014696465_1 | 99.07            | 0.00              | 73      | 726430         | 6957411      | 41.27  | 208452  | 90174   | 11  | 23  | 0                 |
| <i>Anabaena cylindrica</i> PCC7122           | Europe        | GCA_000317695_1 | 99.44            | 0.00              | 7       | 6395836        | 7063285      | 38.79  | 6395836 | 6395836 | 1   | 1   | 0                 |
| <i>Anabaena cylindrica</i> UHCC 0172         | Europe        | GCA_034931625.1 | 99.15            | 0.00              | 154     | 195863         | 6371687      | 38.66  | 66312   | 39261   | 33  | 63  | 28.25             |
| <i>Anabaena lutea</i> FACHB196               | Asia          | GCA_014698305_1 | 99.67            | 0.00              | 63      | 529190         | 6059416      | 39.25  | 192513  | 109373  | 10  | 21  | 0                 |
| <i>Anabaena minutissima</i> FACHB250         | Asia          | GCA_014697125_1 | 99.33            | 0.00              | 119     | 597336         | 7065205      | 41.08  | 161999  | 74121   | 14  | 31  | 0                 |
| <i>Anabaena</i> sp. 4-3                      | North America | GCA_001597745_1 | 98.89            | 0.22              | 62      | 496013         | 5598787      | 41.4   | 206377  | 129956  | 10  | 19  | 105.4             |
| <i>Anabaena</i> sp. 49628 E55                | North America | GCA_021300315_1 | 99.22            | 0.00              | 112     | 215540         | 4873444      | 37.29  | 79416   | 45159   | 21  | 40  | 6.5               |
| <i>Anabaena</i> sp. 49633 E8                 | North America | GCA_021300225_1 | 99.56            | 0.22              | 318     | 223937         | 8566965      | 38.07  | 38235   | 21334   | 69  | 144 | 4.13              |
| <i>Anabaena</i> sp. 54                       | Europe        | GCA_017355725_1 | 99.11            | 0.45              | 69      | 482238         | 5567125      | 38.33  | 122796  | 73166   | 12  | 26  | 0                 |
| <i>Anabaena</i> sp. 90                       | Europe        | GCA_000312705_1 | 91.38            | 77.41             | 5       | 4329264        | 5305675      | 38.1   | 4329264 | 4329264 | 1   | 1   | 0                 |
| <i>Anabaena</i> sp. AL09                     | North America | GCA_001672255_1 | 98.33            | 0.19              | 109     | 261741         | 4657189      | 38.14  | 64976   | 38711   | 23  | 46  | 94.2              |
| <i>Anabaena</i> sp. AL93                     | North America | GCA_001672085_1 | 99.67            | 0.00              | 217     | 133848         | 5662506      | 38.36  | 46343   | 28501   | 44  | 83  | 0                 |
| <i>Anabaena</i> sp. CA ATCC 33047            | North America | GCA_001597855_1 | 98.11            | 0.00              | 67      | 578591         | 5549443      | 41.39  | 201628  | 114799  | 9   | 18  | 230.04            |
| <i>Anabaena</i> sp. CoA2 C59                 | North America | GCA_021297915_1 | 99.67            | 0.52              | 162     | 111287         | 4225696      | 37.03  | 41432   | 22791   | 35  | 69  | 0                 |
| <i>Anabaena</i> sp. CRKS33                   | North America | GCA_001672075_1 | 98.56            | 0.22              | 865     | 55883          | 4860204      | 37.52  | 13640   | 6103    | 105 | 238 | 0                 |
| <i>Anabaena</i> sp. FACHB1237                | Asia          | GCA_014696225_1 | 99.44            | 0.22              | 95      | 224844         | 4647682      | 34.96  | 97967   | 43396   | 15  | 32  | 0                 |
| <i>Anabaena</i> sp. FACHB1250                | Asia          | GCA_014696335_1 | 99.67            | 1.78              | 107     | 170919         | 4436573      | 37.64  | 72652   | 43942   | 23  | 42  | 0                 |
| <i>Anabaena</i> sp. FACHB1391                | Asia          | GCA_014696755_1 | 98.67            | 0.00              | 90      | 208994         | 4497192      | 37.64  | 102015  | 57036   | 17  | 32  | 0                 |

|                                             |               |                 |       |      |      |         |         |       |         |         |     |     |         |
|---------------------------------------------|---------------|-----------------|-------|------|------|---------|---------|-------|---------|---------|-----|-----|---------|
| <i>Anabaena</i> sp. FACHB709                | Asia          | GCA_014696765_1 | 99.00 | 0.33 | 80   | 657653  | 7102143 | 41.26 | 205481  | 89988   | 12  | 24  | 0       |
| <i>Anabaena</i> sp. FACHB83                 | Asia          | GCA_014697485_1 | 99.22 | 0.33 | 116  | 516073  | 8511586 | 40.64 | 190745  | 73849   | 14  | 32  | 0       |
| <i>Anabaena sphaerica</i> FACHB251          | Asia          | GCA_014696825_1 | 99.19 | 0.00 | 46   | 846047  | 6198606 | 38.79 | 296026  | 132715  | 6   | 15  | 0       |
| <i>Anabaena</i> sp. LE011 02                | North America | GCA_001672225_1 | 99.48 | 0.11 | 122  | 215935  | 4740750 | 38.08 | 64747   | 33199   | 23  | 49  | 45.06   |
| <i>Anabaena</i> sp. MDT14b                  | North America | GCA_001672195_1 | 99.22 | 0.11 | 1059 | 34317   | 4890627 | 38.74 | 8249    | 4605    | 176 | 376 | 0       |
| <i>Anabaena</i> sp. PCC7108                 | Europe        | GCA_000332135_1 | 97.17 | 4.22 | 3    | 5714552 | 5886741 | 38.78 | 5714552 | 5714552 | 1   | 1   | 16.99   |
| <i>Anabaena</i> sp. SpSt 373                | North America | GCA_011332035_1 | 99.63 | 0.07 | 153  | 244587  | 7193660 | 40.87 | 83043   | 49100   | 29  | 57  | 0       |
| <i>Anabaena</i> sp. UBA12330                | North America | GCA_003525565_1 | 99.56 | 0.44 | 81   | 204597  | 4285598 | 36.99 | 90280   | 54352   | 18  | 34  | 357.8   |
| <i>Anabaena</i> sp. UHCC 0204               | Europe        | GCA_009711975_1 | 98.56 | 0.22 | 83   | 344565  | 5744555 | 37.57 | 131886  | 78143   | 13  | 26  | 161.04  |
| <i>Anabaena</i> sp. UHCC 0253               | Europe        | GCA_009712085_1 | 99.22 | 0.22 | 28   | 945358  | 6116306 | 37.55 | 553243  | 326530  | 4   | 8   | 1475.11 |
| <i>Anabaena</i> sp. UHCC 0399               | Europe        | GCA_034931465.1 | 97.67 | 0.44 | 118  | 229763  | 6570125 | 41.04 | 90169   | 60776   | 24  | 46  | 117.32  |
| <i>Anabaena</i> sp. UHCC 0451               | Europe        | GCA_034931405.1 | 99.78 | 0.22 | 74   | 348687  | 5621773 | 37.86 | 140240  | 80181   | 15  | 27  | 306.61  |
| <i>Anabaena</i> sp. WA102                   | North America | GCA_001277295_1 | 99.89 | 0.44 | 2    | 5705437 | 5782034 | 38.38 | 5705437 | 5705437 | 1   | 1   | 0       |
| <i>Anabaena</i> sp. WA113                   | North America | GCA_001672155_1 | 99.33 | 0.00 | 261  | 172747  | 4687987 | 37.23 | 71945   | 35358   | 22  | 44  | 0       |
| <i>Anabaena</i> sp. YBS01                   | Asia          | GCA_009498015_1 | 99.22 | 0.00 | 1    | 7013200 | 7013200 | 41.43 | 7013200 | 7013200 | 1   | 1   | 0       |
| <i>Anabaena subtropica</i> FACHB260         | Asia          | GCA_014697105_1 | 99.33 | 0.22 | 105  | 342035  | 5809825 | 40.83 | 108475  | 56412   | 17  | 36  | 0       |
| <i>Anabaena variabilis</i> FACHB164         | Asia          | GCA_014698355_1 | 99.67 | 0.00 | 33   | 648438  | 5986679 | 39.32 | 394797  | 243352  | 6   | 11  | 0       |
| <i>Anabaena variabilis</i> FACHB171         | Asia          | GCA_014697155_1 | 99.33 | 0.22 | 87   | 478819  | 7067220 | 41.27 | 185514  | 89988   | 13  | 26  | 0       |
| <i>Aphanizomenon flos aquae</i> 2012KM1D3   | Europe        | GCA_000789435_1 | 87.52 | 7.22 | 325  | 120451  | 5741771 | 38.22 | 25535   | 14018   | 73  | 148 | 0.47    |
| <i>Aphanizomenon flos aquae</i> CCAP 14461C | North America | GCA_019800585_1 | 98.11 | 0.00 | 286  | 181707  | 6756227 | 38.75 | 37602   | 20260   | 53  | 114 | 17.11   |
| <i>Aphanizomenon flos aquae</i> CCAP 14461C | North America | GCA_019800605_1 | 98.33 | 0.00 | 254  | 177696  | 6761576 | 38.75 | 43156   | 24189   | 49  | 100 | 24.57   |
| <i>Aphanizomenon flos aquae</i> Clear A1    | North America | GCA_014654815_1 | 99.89 | 0.22 | 60   | 381826  | 4442226 | 37.14 | 120880  | 84307   | 11  | 23  | 56.28   |
| <i>Aphanizomenon flos aquae</i> CP01        | North America | GCA_017355665_1 | 99.22 | 0.89 | 152  | 295745  | 4356503 | 36.95 | 54035   | 33983   | 22  | 46  | 0       |
| <i>Aphanizomenon flos aquae</i> DEX188      | North America | GCA_017346855_1 | 99.89 | 0.00 | 1    | 4538078 | 4538078 | 37.06 | 4538078 | 4538078 | 1   | 1   | 0       |
| <i>Aphanizomenon flos aquae</i>             | Asia          | GCA_014696815_1 | 99.22 | 0.11 | 155  | 163255  | 5786747 | 38.4  | 58342   | 37171   | 31  | 62  | 0       |

|                                               |               |                  |        |       |      |         |         |       |         |         |    |     |         |
|-----------------------------------------------|---------------|------------------|--------|-------|------|---------|---------|-------|---------|---------|----|-----|---------|
| FACHB1040                                     |               |                  |        |       |      |         |         |       |         |         |    |     |         |
| <i>Aphanizomenon flos aquae</i><br>FACHB1171  | Asia          | GCA_014697315_1  | 99.44  | 0.00  | 91   | 214077  | 4343146 | 37.04 | 78897   | 47174   | 19 | 36  | 0       |
| <i>Aphanizomenon flos aquae</i><br>FACHB1249  | Asia          | GCA_014698725_1  | 99.89  | 0.00  | 97   | 321580  | 4350034 | 37.01 | 83039   | 44916   | 18 | 35  | 0       |
| <i>Aphanizomenon flos aquae</i><br>FACHB1265  | Asia          | GCA_014698705_1  | 99.89  | 0.00  | 88   | 223715  | 4343226 | 37.02 | 85704   | 41837   | 16 | 34  | 0       |
| <i>Aphanizomenon flos aquae</i><br>FACHB1287  | Asia          | GCA_014698755_1  | 99.89  | 0.00  | 85   | 223784  | 4347270 | 37.03 | 85728   | 49088   | 16 | 33  | 0       |
| <i>Aphanizomenon flos aquae</i><br>FACHB1290  | Asia          | GCA_014698295_1  | 99.67  | 0.22  | 136  | 156477  | 4314391 | 37.01 | 55341   | 28108   | 26 | 55  | 0       |
| <i>Aphanizomenon flos aquae</i><br>FACHB1416  | Asia          | GCA_014698695_1  | 99.89  | 0.22  | 162  | 137305  | 4287223 | 37.13 | 43168   | 25223   | 32 | 62  | 0       |
| <i>Aphanizomenon flos aquae</i><br>KM1D3 PB   | Europe        | GCA_017346875_1  | 99.44  | 0.22  | 1    | 6071322 | 6071322 | 38.39 | 6071322 | 6071322 | 1  | 1   | 0       |
| <i>Aphanizomenon flos aquae</i> LD13          | North America | GCA_001672165_1  | 99.67  | 0.37  | 199  | 160417  | 4401776 | 37.03 | 55961   | 29540   | 27 | 53  | 0       |
| <i>Aphanizomenon flos aquae</i><br>SRR3727505 | Europe        | Unpublished data | 99.00  | 1.00  | 399  | 50419   | 4132940 | 37.09 | 14233   | 8522    | 93 | 186 | 102.83  |
| <i>Aphanizomenon flos aquae</i><br>MDT14a     | North America | GCA_001672095_1  | 99.44  | 0.56  | 171  | 242078  | 4623430 | 37.09 | 60437   | 33975   | 27 | 52  | 0       |
| <i>Aphanizomenon flos aquae</i> NIES-81       | Asia          | GCA_000521175_1  | 99.67  | 0.22  | 38   | 2605121 | 5831251 | 38.47 | 1857322 | 1857322 | 2  | 2   | 2894.34 |
| <i>Aphanizomenon flos aquae</i> UKL13 PB      | North America | GCA_001593825_2  | 99.89  | 3.60  | 15   | 958282  | 4484012 | 37.04 | 767568  | 398059  | 3  | 5   | 0       |
| <i>Aphanizomenon flos aquae</i> WA102         | North America | GCA_001672105_1  | 98.48  | 11.36 | 1106 | 119846  | 5923586 | 39.11 | 24228   | 11348   | 68 | 154 | 0       |
| <i>Aphanizomenon</i> sp. FACHB1399            | Asia          | GCA_014698245_1  | 99.67  | 0.00  | 100  | 331699  | 4348078 | 37.01 | 76250   | 42563   | 19 | 37  | 0       |
| <i>Aphanizomenon</i> sp. FACHB1401            | Asia          | GCA_014698265_1  | 99.67  | 0.00  | 104  | 153821  | 4349063 | 37.05 | 75924   | 41787   | 21 | 40  | 0       |
| <i>Aphanizomenon</i> sp. UHCC 0183            | Europe        | GCA_009712065_1  | 99.22  | 0.22  | 182  | 177534  | 5579684 | 38.36 | 56985   | 26535   | 31 | 69  | 593.74  |
| <i>Chroococciopsis thermalis</i> PCC 7203     | Europe        | GCA_000317125_1  | 99.63  | 1.44  | 3    | 6315792 | 6689401 | 44.47 | 6315792 | 6315792 | 1  | 1   | 0       |
| <i>Cuspidothrix issatschenkoi</i><br>CHARLIE1 | Europe        | GCA_002934005_1  | 97.78  | 0.00  | 243  | 160023  | 4547138 | 37.67 | 35946   | 19639   | 42 | 87  | 93.25   |
| <i>Cuspidothrix issatschenkoi</i> LEGE        | Europe        | GCA_015207795_1  | 100.00 | 0.11  | 333  | 97409   | 5113591 | 37.75 | 29781   | 15454   | 55 | 111 | 0.06    |

|                                                  |               |                 |       |      |     |         |         |       |         |         |    |     |         |
|--------------------------------------------------|---------------|-----------------|-------|------|-----|---------|---------|-------|---------|---------|----|-----|---------|
| 03284                                            |               |                 |       |      |     |         |         |       |         |         |    |     |         |
| <i>Dolichospermum circinale</i><br>AWQC131C      | Oceania       | GCA_000426905_1 | 99.78 | 0.00 | 121 | 254267  | 4445648 | 37.33 | 80443   | 52884   | 17 | 34  | 867.21  |
| <i>Dolichospermum circinale</i><br>AWQC310F      | Oceania       | GCA_000426925_1 | 99.78 | 0.00 | 82  | 360115  | 4405846 | 37.49 | 119350  | 65648   | 13 | 25  | 425.25  |
| <i>Dolichospermum circinale</i> Clear<br>D4      | North America | GCA_014654715_1 | 92.05 | 6.49 | 560 | 117237  | 5029933 | 36.96 | 18484   | 6545    | 75 | 192 | 224.66  |
| <i>Dolichospermum compactum</i><br>NIES806       | Asia          | GCA_002368115_1 | 99.33 | 0.22 | 1   | 5165988 | 5165988 | 38.06 | 5165988 | 5165988 | 1  | 1   | 1587.63 |
| <i>Dolichospermum flos aquae</i> CCAP<br>140313F | North America | GCA_012516395_1 | 99.67 | 0.44 | 2   | 5151752 | 5220684 | 38.15 | 5151752 | 5151752 | 1  | 1   | 0       |
| <i>Dolichospermum flos aquae</i> LEGE<br>04289   | Europe        | GCA_015207785_1 | 99.00 | 0.41 | 135 | 295537  | 4435098 | 37.65 | 54871   | 32276   | 27 | 54  | 0       |
| <i>Dolichospermum flos aquae</i><br>UHCC 0037    | Europe        | GCA_009712125_1 | 99.00 | 0.63 | 9   | 1818114 | 5563105 | 38.33 | 1095036 | 613144  | 2  | 4   | 136.74  |
| <i>Dolichospermum planctonicum</i><br>NIES-80    | Asia          | GCA_005402965_1 | 99.22 | 0.33 | 152 | 221952  | 4556907 | 37.7  | 75157   | 45488   | 20 | 39  | 0       |
| <i>Dolichospermum planctonicum</i><br>UHCC 0167  | Europe        | GCA_009712075_1 | 97.55 | 0.19 | 33  | 564450  | 4900328 | 37.47 | 253071  | 206132  | 7  | 12  | 3391.04 |
| <i>Dolichospermum</i> sp. BR01                   | North America | GCA_018447705_1 | 99.89 | 4.11 | 3   | 5439257 | 5575959 | 38.19 | 5439257 | 5439257 | 1  | 1   | 0       |
| <i>Dolichospermum</i> sp. DET50                  | North America | GCA_018295975_1 | 99.67 | 0.22 | 3   | 5825454 | 6065531 | 37.8  | 5825454 | 5825454 | 1  | 1   | 0       |
| <i>Dolichospermum</i> sp. DET66                  | North America | GCA_018295985_1 | 99.67 | 0.00 | 3   | 5835936 | 6113795 | 37.79 | 5835936 | 5835936 | 1  | 1   | 0       |
| <i>Dolichospermum</i> sp. DET67                  | North America | GCA_018295965_1 | 99.67 | 0.00 | 5   | 5835936 | 6126501 | 37.79 | 5835936 | 5835936 | 1  | 1   | 0       |
| <i>Dolichospermum</i> sp. DET69                  | North America | GCA_017355425_1 | 99.67 | 0.00 | 2   | 5839262 | 6040057 | 37.8  | 5839262 | 5839262 | 1  | 1   | 0       |
| <i>Dolichospermum</i> sp. DET73                  | North America | GCA_017355625_1 | 99.67 | 0.00 | 286 | 120710  | 5233469 | 38.06 | 31278   | 16316   | 56 | 113 | 0       |
| <i>Dolichospermum</i> sp. DEX182a                | North America | GCA_017355645_1 | 99.67 | 1.11 | 4   | 3410753 | 5014232 | 38.29 | 3410753 | 1583037 | 1  | 2   | 0       |
| <i>Dolichospermum</i> sp. DEX189                 | North America | GCA_017355655_1 | 98.22 | 1.11 | 8   | 3703826 | 6054507 | 38.39 | 3703826 | 895365  | 1  | 2   | 0       |
| <i>Dolichospermum</i> sp. DL01                   | North America | GCA_017346835_1 | 97.67 | 0.11 | 1   | 4827232 | 4827232 | 38.19 | 4827232 | 4827232 | 1  | 1   | 0       |
| <i>Dolichospermum</i> sp. FACHB1091              | Asia          | GCA_014697585_1 | 99.67 | 0.00 | 59  | 252710  | 4516276 | 37.5  | 124205  | 71273   | 13 | 25  | 0       |
| <i>Dolichospermum</i> sp. JUN01                  | North America | GCA_017355635_1 | 99.55 | 0.45 | 253 | 234876  | 5023336 | 38.33 | 75344   | 31935   | 24 | 50  | 0       |
| <i>Dolichospermum</i> sp. LBC05a                 | North America | GCA_017346815_1 | 94.19 | 3.74 | 1   | 5178591 | 5178591 | 38.21 | 5178591 | 5178591 | 1  | 1   | 0       |

|                                      |               |                 |        |      |     |         |         |       |         |         |     |     |        |
|--------------------------------------|---------------|-----------------|--------|------|-----|---------|---------|-------|---------|---------|-----|-----|--------|
| <i>Dolichospermum</i> sp. LEGE 00240 | Europe        | GCA_015207875_1 | 99.67  | 0.11 | 172 | 201700  | 5192325 | 38.42 | 55172   | 30510   | 29  | 60  | 0      |
| <i>Dolichospermum</i> sp. LEGE 00246 | Europe        | GCA_015207865_1 | 100.00 | 0.96 | 779 | 48182   | 5708300 | 38.77 | 10796   | 5958    | 162 | 340 | 0      |
| <i>Dolichospermum</i> sp. OL01       | North America | GCA_018447755_1 | 98.33  | 0.44 | 2   | 5178840 | 5274066 | 38.19 | 5178840 | 5178840 | 1   | 1   | 0.02   |
| <i>Dolichospermum</i> sp. SB001      | North America | GCA_016462165_1 | 99.67  | 0.11 | 965 | 24387   | 4311702 | 38.35 | 5456    | 3411    | 254 | 505 | 184.85 |
| <i>Dolichospermum</i> sp. UHCC 0187  | Europe        | GCA_009712035.1 | 90.96  | 0.56 | 76  | 759950  | 5308777 | 38.2  | 161299  | 84937   | 8   | 19  | 88.34  |
| <i>Dolichospermum</i> sp. UHCC 0259  | Europe        | GCA_009711935_1 | 99.89  | 0.67 | 316 | 181958  | 5630158 | 38    | 34021   | 18346   | 50  | 108 | 30.34  |
| <i>Dolichospermum</i> sp. UHCC 0260  | Europe        | GCA_009711985_1 | 99.22  | 0.00 | 113 | 184152  | 4921436 | 38.09 | 74043   | 38012   | 23  | 45  | 603.67 |
| <i>Dolichospermum</i> sp. UHCC 0299  | Europe        | GCA_009711965_1 | 99.67  | 0.22 | 288 | 160154  | 5118028 | 38.05 | 31633   | 17653   | 52  | 106 | 8.11   |
| <i>Dolichospermum</i> sp. UHCC 0315A | Europe        | GCA_008121535_1 | 99.67  | 0.22 | 4   | 5407479 | 5642022 | 38.16 | 5407479 | 5407479 | 1   | 1   | 0      |
| <i>Dolichospermum</i> sp. UHCC 0352  | Europe        | GCA_009711925_1 | 99.44  | 0.00 | 314 | 88234   | 5122584 | 38.01 | 31029   | 16542   | 54  | 110 | 32.89  |
| <i>Dolichospermum</i> sp. UHCC 0406  | Europe        | GCA_009712025_1 | 99.22  | 0.22 | 42  | 515837  | 5178080 | 38.04 | 354243  | 181847  | 6   | 12  | 109.21 |
| <i>Dolichospermum</i> sp. UHCC 0684  | Europe        | GCA_034931665.1 | 96.59  | 0.00 | 274 | 83516   | 4841461 | 38.05 | 27888   | 14602   | 57  | 116 | 121.86 |
| <i>Dolichospermum</i> sp. UKL201     | North America | GCA_017346795_1 | 99.67  | 0.00 | 1   | 5294355 | 5294355 | 38.2  | 5294355 | 5294355 | 1   | 1   | 0      |
| <i>Dolichospermum</i> sp. WA123      | North America | GCA_018447775_1 | 99.67  | 0.00 | 3   | 4881389 | 4984963 | 38.28 | 4881389 | 4881389 | 1   | 1   | 0      |



**Table S3.** Number of strains, MAA biosynthetic gene clusters and the relative abundance of MAA biosynthetic gene clusters in the genomes of 101 analyzed *Anabaena*, *Dolichospermum*, *Aphanizomenon* (ADA) strains.

| Species/group | Number of strains | Number of MAA biosynthetic gene clusters | Relative abundance (%) |
|---------------|-------------------|------------------------------------------|------------------------|
| ADA-1         | 10                | 0                                        | 0.00                   |
| ADA-2         | 22                | 13                                       | 59.09                  |
| ADA-3         | 11                | 3                                        | 27.27                  |
| ADA-4         | 19                | 19                                       | 100.00                 |
| ADA-5         | 1                 | 0                                        | 0.00                   |
| ADA-6         | 4                 | 0                                        | 0.00                   |
| ADA-7         | 2                 | 1                                        | 50.00                  |
| ADA-8         | 2                 | 0                                        | 0.00                   |
| ADA-9         | 1                 | 0                                        | 0.00                   |
| ADA-10        | 1                 | 0                                        | 0.00                   |
| ADA-11        | 1                 | 0                                        | 0.00                   |
| ADA-12        | 1                 | 0                                        | 0.00                   |
| All ADA       | 75                | 36                                       | 48.00                  |
| Others        | 26                | 11                                       | 42.30                  |
| All           | 101               | 47                                       | 46.53                  |

**Table S4.** The strain number, year of isolation, growth medium, and sampling location for the *Dolichospermum* strains (Halinen *et al.*, 2007 and Halinen *et al.*, 2008). Z8 growth medium (Kotai, 1972) \*supplemented with NaCl and MgSO<sub>4</sub>. + Approximated coordinates. N/A indicates coordinates not available.

| UHCC code | Strain | Year | Suppl* | Location            | Coordinates               | MAA |
|-----------|--------|------|--------|---------------------|---------------------------|-----|
| UHCC 0652 | BIR3   | 2003 | +      | The Gulf of Finland | 60.10, 26.15 <sup>+</sup> | -   |
| UHCC 0762 | BIR4   | 2003 | +      | The Gulf of Finland | 60.10, 26.15 <sup>+</sup> | -   |
| UHCC 0680 | BIR25  | 2004 | -      | The Gulf of Finland | 59.2901, 23.5702          | -   |
| UHCC 0631 | BIR28  | 2004 | -      | The Gulf of Finland | 59.2901, 23.5702          | -   |
| UHCC 0626 | BIR30  | 2004 | +      | The Gulf of Finland | 59.2901, 23.5702          | -   |
| UHCC 0310 | BIR49  | 2004 | +      | The Gulf of Finland | 59.2901, 23.5702          | -   |
| UHCC 0650 | BIR50  | 2004 | -      | The Gulf of Finland | 59.5701, 24.4500          | +   |
| UHCC 0627 | BIR50  | 2004 | +      | The Gulf of Finland | 59.3515, 24.0700          | -   |
| UHCC 0640 | BIR52  | 2004 | -      | The Gulf of Finland | 59.3515, 24.0700          | +   |
| UHCC 0639 | BIR53  | 2004 | -      | The Gulf of Finland | 59.3515, 24.0700          | -   |
| UHCC 0641 | BIR56  | 2004 | -      | The Gulf of Finland | 59.3515, 24.0700          | -   |
| UHCC 0656 | BIR66  | 2004 | -      | The Gulf of Finland | 59.2551, 22.5206          | -   |
| UHCC 0643 | BIR73  | 2004 | -      | The Gulf of Finland | 59.5701, 24.4500          | -   |
| UHCC 0638 | BIR78  | 2004 | -      | The Gulf of Finland | 59.5701, 24.4500          | -   |
| UHCC 0658 | BIR84  | 2004 | -      | The Gulf of Finland | 59.2551, 22.5206          | -   |
| UHCC 0671 | BIR94  | 2004 | -      | The Gulf of Finland | 59.3882, 23.3903          | -   |
| UHCC 0661 | BIR130 | 2004 | -      | The Gulf of Finland | 59.3020, 22.4031          | -   |
| UHCC 0663 | BIR162 | 2004 | -      | The Gulf of Finland | 59.1259, 22.1894          | -   |
| UHCC 0753 | BIR169 | 2004 | -      | The Gulf of Finland | 59.1259, 22.1894          | -   |
| UHCC 0291 | BIR202 | 2004 | +      | The Gulf of Finland | 59.3250, 23.1000          | -   |

|           |         |      |   |                     |                  |   |
|-----------|---------|------|---|---------------------|------------------|---|
| UHCC 0676 | BIR208  | 2004 | - | The Gulf of Finland | 59.3250, 23.1000 | - |
| UHCC 0620 | BIR232  | 2004 | + | The Gulf of Finland | 59.2802, 22.3858 | - |
| UHCC 0677 | BIR241  | 2004 | - | The Gulf of Finland | N/A              | - |
| UHCC 0767 | BIR246  | 2004 | - | The Gulf of Finland | 60.0400, 26.2087 | + |
| UHCC 0684 | BIR258  | 2004 | - | The Gulf of Finland | 60.0400, 26.2087 | + |
| UHCC 0259 | BIR259  | 2004 | - | The Gulf of Finland | 60.0400, 26.2087 | - |
| UHCC 0260 | BIR260  | 2004 | - | The Gulf of Finland | 60.0400, 26.2087 | + |
| UHCC 0629 | BIR272  | 2004 | - | The Gulf of Finland | 59.3218, 22.5014 | - |
| UHCC 0624 | BIR348  | 2004 | + | The Gulf of Finland | 59.2400, 22.2551 | - |
| UHCC 0623 | BIR358  | 2004 | + | The Gulf of Finland | 59.2400, 22.2551 | - |
| UHCC 0673 | BIR370A | 2004 | - | The Gulf of Finland | 59.1330, 22.2851 | - |
| UHCC 0633 | BIR370B | 2004 | - | The Gulf of Finland | 59.1330, 22.2851 | - |
| UHCC 0634 | BIR374  | 2004 | - | The Gulf of Finland | 59.1701, 22.4700 | - |
| UHCC 0625 | BIR406  | 2004 | + | The Gulf of Finland | 59.4181, 23.5798 | - |
| UHCC 0635 | BIR441  | 2004 | - | The Gulf of Finland | 59.3515, 24.0700 | - |
| UHCC 0315 | 315     | 1997 | - | Seurasaari, Finland | N/A              |   |

**Table S5.** The relative abundances (%) of porphyrin-334 and shinorine detected at 334 nm in five strains of *Dolichospermum* normalized against *Dolichospermum* sp. UHCC 0684. The culture producing higher relative abundance of MAAs were used for LC/MS-QTOF analysis and are highlighted in green.

| MAA           | UHCC 0650 | UHCC 0640 | UHCC 0767 | UHCC 0684 | UHCC 0260 |
|---------------|-----------|-----------|-----------|-----------|-----------|
| Porphyrin-334 | 3.5       | 10        | 0.5       | 63.5      | 22.5      |
| Shinorine     | 7         | 15.7      | 1.3       | 36.5      | 39.6      |

**Table S6.** The experienced mass-to-charge ratio ( $m/z$ ), ion intensity, theoretical mass-to-charge ratio ( $m/z$ ), mass error (ppm), molecular formula and putative fragmentations of porphyra-334 ( $m/z$  347.1449) and shinorine.

| No | Porphyra-334, R = CH <sub>3</sub>                                           |                       |                |            | Shinorine, R = H      |                   |           |                                                            |
|----|-----------------------------------------------------------------------------|-----------------------|----------------|------------|-----------------------|-------------------|-----------|------------------------------------------------------------|
|    | Molecular formula                                                           | Theoretical ( $m/z$ ) | $\Delta$ (ppm) | I (x 1000) | Theoretical ( $m/z$ ) | $\Delta$ (ppm)    | I (x 100) | Neutral loss                                               |
| 1  | C <sub>14</sub> H <sub>23</sub> N <sub>2</sub> O <sub>8</sub> <sup>+</sup>  | 347.14489             | -1.3           | 195        | 333.12924             | -2.1              | 88        | N/A                                                        |
| 2  | C <sub>13</sub> H <sub>20</sub> N <sub>2</sub> O <sub>8</sub> <sup>**</sup> | 332.12142             | -1.7           | 3          | 318.10577             | -11.7             | 2         | d                                                          |
| 3  | C <sub>13</sub> H <sub>18</sub> N <sub>2</sub> O <sub>7</sub> <sup>**</sup> | 314.11085             | -1.0           | 7          | 300.09520             | 4.2               | 9         | d, H <sub>2</sub> O                                        |
| 4  | C <sub>12</sub> H <sub>19</sub> N <sub>2</sub> O <sub>7</sub> <sup>+</sup>  | 303.11868             | -0.8           | 147        | 303.11868             | -0.4              | 6         | k                                                          |
| 5  | C <sub>12</sub> H <sub>19</sub> N <sub>2</sub> O <sub>6</sub> <sup>+</sup>  | 301.13941             | 0.1            | 9          | 287.12376             | 3.8               | 8         | m                                                          |
| 6  | C <sub>13</sub> H <sub>16</sub> N <sub>2</sub> O <sub>6</sub> <sup>**</sup> | 296.10029             | -1.8           | 7          | 282.08464             | 3.2               | 8         | d, 2xH <sub>2</sub> O                                      |
| 7  | C <sub>12</sub> H <sub>20</sub> N <sub>2</sub> O <sub>6</sub> <sup>**</sup> | 288.13159             | -1.5           | 11         | 274.11594             | 1.5               | 10        | a/m, d                                                     |
| 8  | C <sub>11</sub> H <sub>15</sub> N <sub>2</sub> O <sub>7</sub> <sup>+</sup>  | 287.08738             | -0.8           | 19         | 287.08738             | -2.9              | 6         | d, k                                                       |
| 9  | C <sub>13</sub> H <sub>15</sub> N <sub>2</sub> O <sub>5</sub> <sup>+</sup>  | 279.09755             | -2.5           | 10         | 265.08190             | -2.8              | 15        | f, g, l                                                    |
| 10 | C <sub>12</sub> H <sub>18</sub> N <sub>2</sub> O <sub>5</sub> <sup>**</sup> | 270.12102             | -1.4           | 10         | 256.10537             | -9.4 <sup>a</sup> | 19        | a, d, H <sub>2</sub> O                                     |
| 11 | C <sub>12</sub> H <sub>17</sub> N <sub>2</sub> O <sub>5</sub> <sup>+</sup>  | 269.11320             | -3.5           | 9          | 255.09755             | 0.4               | 50        | e, f, g                                                    |
| 12 | C <sub>12</sub> H <sub>16</sub> N <sub>2</sub> O <sub>5</sub> <sup>**</sup> | 268.10537             | -3.4           | 8          | 254.08972             | 1.7               | 8         | e, f, g                                                    |
| 13 | C <sub>11</sub> H <sub>20</sub> N <sub>2</sub> O <sub>4</sub> <sup>**</sup> | 244.14176             | -2.9           | 27         | 230.12611             | -0.3              | 25        | a, d, m                                                    |
| 14 | C <sub>10</sub> H <sub>16</sub> N <sub>2</sub> O <sub>5</sub> <sup>**</sup> | 244.10537             | -4.6           | 20         | 244.10537             | -5.8              | 4         | a/m, d, k                                                  |
| 15 | C <sub>10</sub> H <sub>15</sub> N <sub>2</sub> O <sub>5</sub> <sup>+</sup>  | 243.09755             | -3.3           | 37         | 243.09755             | -3.7              | 12        | e, g, k                                                    |
| 16 | C <sub>10</sub> H <sub>13</sub> N <sub>2</sub> O <sub>5</sub> <sup>+</sup>  | 241.08190             | -1.5           | 25         | 241.08190             | 1.5               | 19        | e, g, k                                                    |
| 17 | C <sub>10</sub> H <sub>15</sub> N <sub>2</sub> O <sub>4</sub> <sup>+</sup>  | 227.10263             | 0.5            | 31         | 227.10263             | 1.4               | 6         | (j, H <sub>2</sub> O)/(b, k, H <sub>2</sub> O)/(a/m, g, k) |
| 18 | C <sub>10</sub> H <sub>13</sub> N <sub>2</sub> O <sub>3</sub> <sup>+</sup>  | 209.09207             | 1.8            | 29         | 209.09207             | 2.8               | 12        | a/m, f, g, k                                               |
| 19 | C <sub>9</sub> H <sub>16</sub> N <sub>2</sub> O <sub>3</sub> <sup>**</sup>  | 200.11554             | -0.4           | 116        | 200.11554             | 4.5               | 16        | a, d, k, m                                                 |
| 20 | C <sub>9</sub> H <sub>15</sub> N <sub>2</sub> O <sub>3</sub> <sup>+</sup>   | 199.10772             | -0.9           | 49         | 199.10772             | 5.2               | 24        | a, d, k, m                                                 |
| 21 | C <sub>9</sub> H <sub>13</sub> N <sub>2</sub> O <sub>3</sub> <sup>+</sup>   | 197.09207             | -0.6           | 71         | 197.09207             | -2.6              | 56        | e, f, j                                                    |
| 22 | C <sub>9</sub> H <sub>11</sub> N <sub>2</sub> O <sub>3</sub> <sup>+</sup>   | 195.07642             | 2.7            | 29         | 195.07642             | 5.8               | 12        | f, g, j                                                    |
| 23 | C <sub>8</sub> H <sub>14</sub> N <sub>2</sub> O <sub>3</sub> <sup>**</sup>  | 186.09989             | 1.9            | 95         | 186.09989             | 0.9               | 64        | a, d, j                                                    |
| 24 | C <sub>8</sub> H <sub>13</sub> N <sub>2</sub> O <sub>3</sub> <sup>+</sup>   | 185.09207             | 1.5            | 40         | 185.09207             | -1.7              | 9         | e, g, j                                                    |
| 25 | C <sub>9</sub> H <sub>11</sub> N <sub>2</sub> O <sub>2</sub> <sup>+</sup>   | 179.08150             | 0.8            | 23         | 179.08150             | 0.8               | 12        | (a/m, e, f, g, k)/(b, e, f, h, k)/(e, f, h, j)             |
| 26 | C <sub>8</sub> H <sub>10</sub> NO <sub>3</sub> <sup>+</sup>                 | 168.06552             | 2.0            | 28         | 168.06552             | -1.0              | 11        | e, g, i                                                    |
| 27 | C <sub>9</sub> H <sub>11</sub> N <sub>2</sub> O <sup>+</sup>                | 163.08659             | 2.2            | 23         | 163.08659             | -3.9              | 16        | a/m, f, g, k                                               |
| 28 | C <sub>8</sub> H <sub>11</sub> N <sub>2</sub> O <sup>+</sup>                | 151.08659             | 2.4            | 34         | 151.08659             | -3.6              | 15        | (a, j)/(b, k, m), f, g                                     |
| 29 | C <sub>8</sub> H <sub>9</sub> N <sub>2</sub> O <sup>+</sup>                 | 149.07094             | 5.4            | 61         | 149.07094             | 5.4               | 21        | (b, f, g, k, m)/(a, f, g, j)/(b, f, h, j)                  |
| 30 | C <sub>7</sub> H <sub>9</sub> N <sub>2</sub> O <sup>+</sup>                 | 137.07094             | 4.5            | 52         | 137.07094             | 3.7               | 23        | b, f, g, j                                                 |
| 31 | C <sub>7</sub> H <sub>8</sub> NO <sup>+</sup>                               | 122.06004             | 5.0            | 20         | 122.06004             | 5.8               | 8         | (b, i)/(c, j), f, g                                        |
| 32 | C <sub>6</sub> H <sub>8</sub> NO <sup>+</sup>                               | 110.06004             | 4.6            | 13         | 110.06004             | 4.6               | 5         | (b, i)/(c, j), e, g                                        |
| 33 | C <sub>7</sub> H <sub>8</sub> N <sup>+</sup>                                | 106.06512             | 2.2            | 13         | 106.06512             | 6.9               | 4         | a/(k, m), e, f, g, i                                       |

**Table S7.** The observed retention times and peak areas of compounds with absorption maxima at 334 nm detected from the 36 analyzed *Dolichospermum* strains in the UPLC analysis. **A.** Compound assigned tentatively as porphyra-334. **B.** Compound assigned tentatively as shinorine.

| A. Porphyra-334 |                      |           | B. Shinorine         |           |
|-----------------|----------------------|-----------|----------------------|-----------|
| Strain          | Retention time (min) | Peak area | Retention time (min) | Peak area |
| UHCC 0684       | 6.29                 | 14470.504 | 6.71                 | 400.688   |
| UHCC 0260       | 6.29                 | 5127.837  | 6.71                 | 436.244   |

**Table S8.** The maximum absorption, molecular weights, mass of protonated molecules, molar extinction coefficients and molecular formulas of porphyra-334 and shinorine (as reported in La Barre *et al.*, 2014).

| MAA          | Absorbance $\lambda_{max}$ (nm) | Molecular weight (g/mol) | [M + H] <sup>+</sup> (m/z) | Extinction coefficient $\epsilon$ (L/mol/cm) | Molecular formula                                             |
|--------------|---------------------------------|--------------------------|----------------------------|----------------------------------------------|---------------------------------------------------------------|
| Porphyra-334 | 334                             | 346.336                  | 347.1                      | 42300                                        | C <sub>14</sub> H <sub>22</sub> N <sub>2</sub> O <sub>8</sub> |
| Shinorine    | 334                             | 332.31                   | 333.1                      | 44668                                        | C <sub>13</sub> H <sub>20</sub> N <sub>2</sub> O <sub>8</sub> |

**Table S9.** Obtained adjusted p values from the Kruskal–Wallis tests with post hoc Dunn’s test.

| Comparison                      | Adjusted p   |
|---------------------------------|--------------|
| 2021 Helsinki vs. 2021 Turku    | 2.734166e-01 |
| 2021 Helsinki vs. 2021 Helsinki | 1.737499e-04 |
| 2021 Turku vs. 2022 Helsinki    | 2.659849e-05 |
| 2021 Helsinki vs. 2022 Turku    | 2.827127e-03 |
| 2021 Turku vs. 2022 Turku       | 3.263397e-04 |
| 2022 Helsinki vs. 2022 Turku    | 7.591861e-01 |

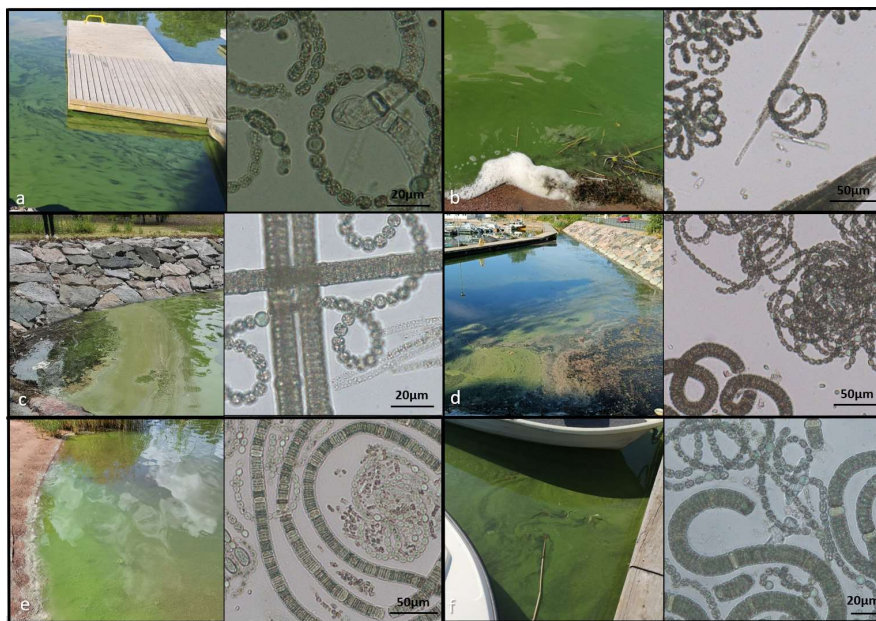

**Figure S1.** Blooms samples and microscopy images. (a) Rajasaari, Helsinki, 08.07.2022 (b) Munkkiniemi, Helsinki 19.07.2022 (c) Rajasaari, Helsinki, 05.08.2022 (d) Rajasaari, Helsinki, 09.08.2022 (e) Kultaranta, Turku (09.08.2022) (f) Kaarina, Turku, 16.08.2022.

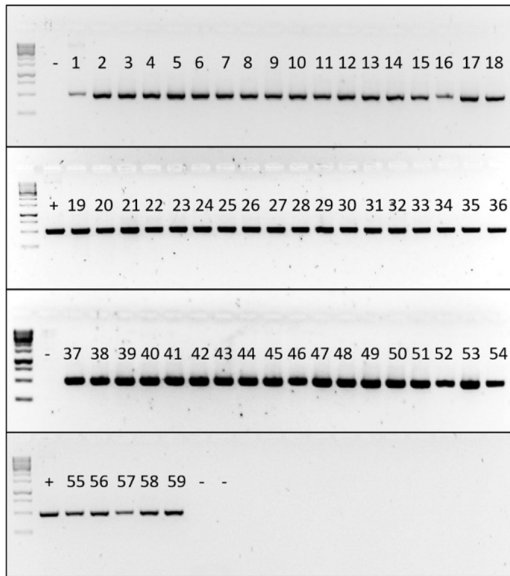

**Figure S2.** PCR amplification of *mysB* gene from 59 samples of surface blooms collected in 2021 and 2022. – indicates the negative control (DNAse/RNAse free water), + indicates the positive control (UHCC 0260).

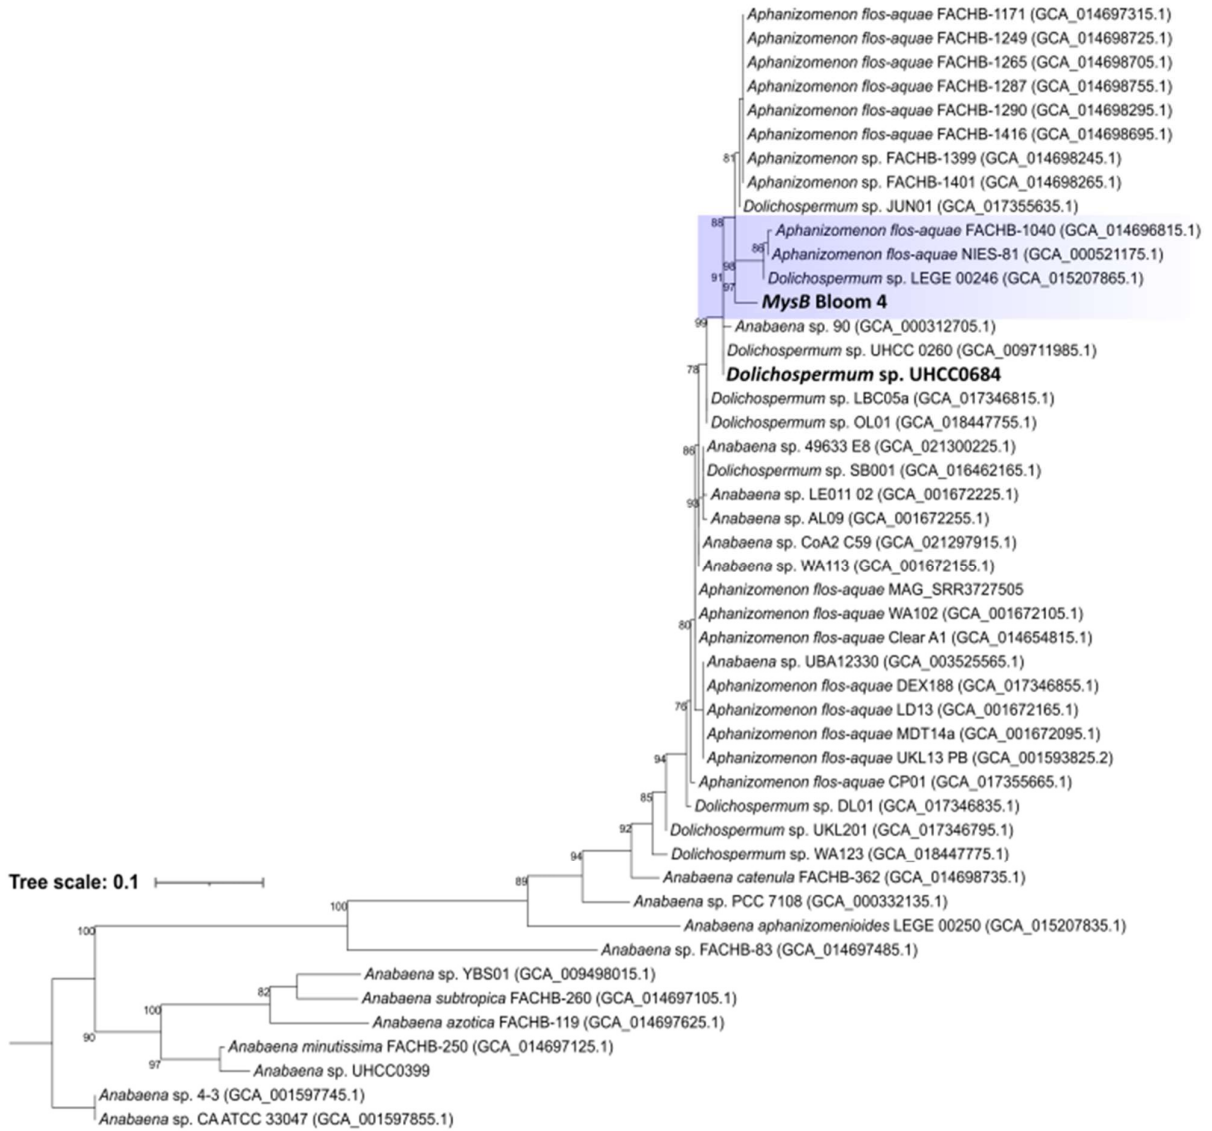

**Figure S3.** The phylogenetic tree of ADA clade showing position of the *mysB* gene amplified and sequenced from bloom sample no. 4.



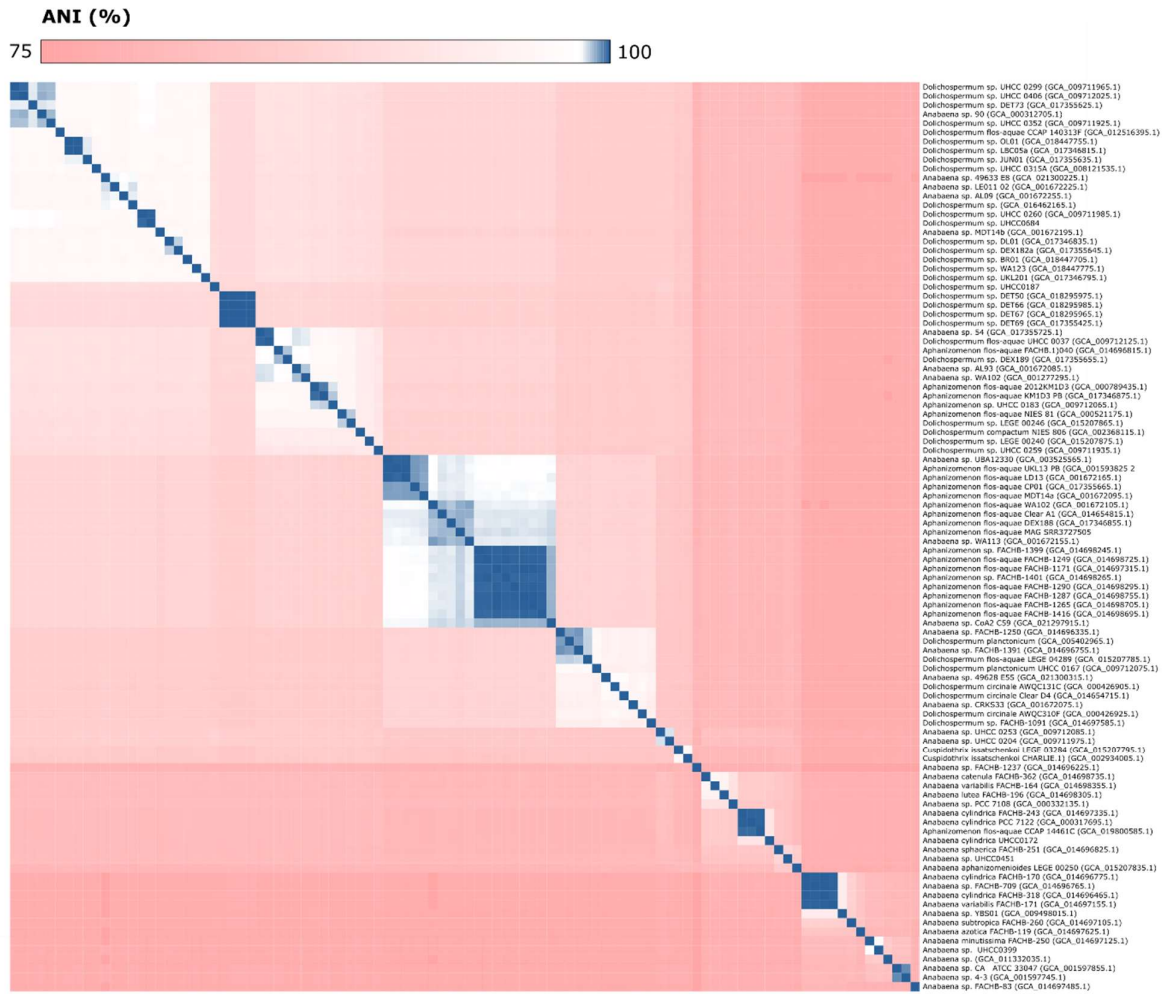

**Figure S4.** The Average Nucleotide Identities (ANI) of 101 *Anabaena*, *Dolichospermum* and *Aphanizomeon* complete of draft genomes analyzed (Table S4).

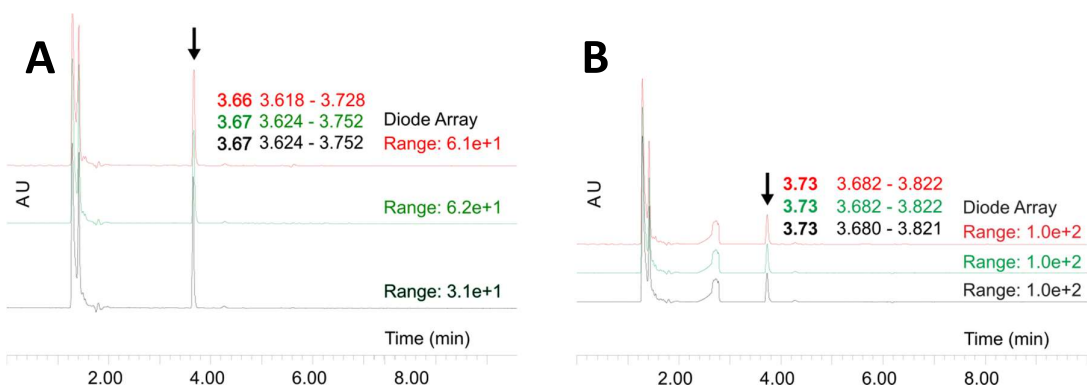

**Figure S5.** Collected porphyra-334 fractions from three injections of MAA methanol extracts from analyzed *Dolichospermum* samples. Collected peaks indicated by arrow, retention time (min) in bold and collected fraction (min) reported next to the peak. **A.** *Dolichospermum* sp. UHCC 0684, 1  $\mu$ l injection in black, 2  $\mu$ l injections in green and red. **B.** *Dolichospermum* sp. UHCC 0260, 1  $\mu$ l injection in black, 2  $\mu$ l injections in green and red.

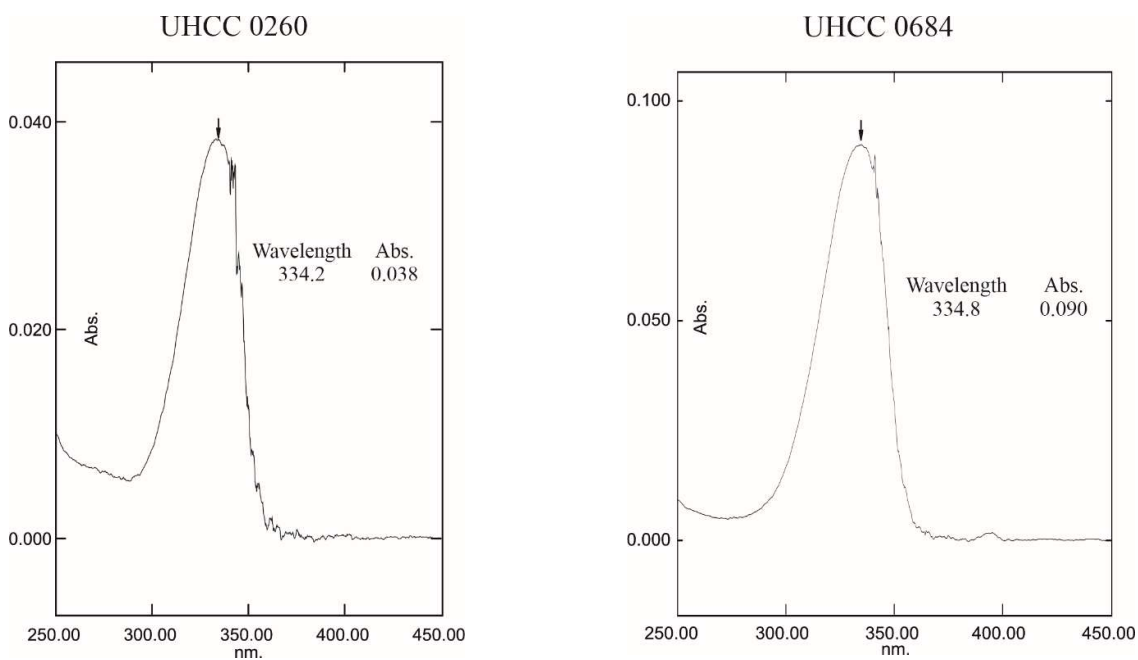

**Figure S6.** Purification of shininone and porphyra-334 from *Dolichospermum* spp. UHCC 0260 and UHCC 0684.



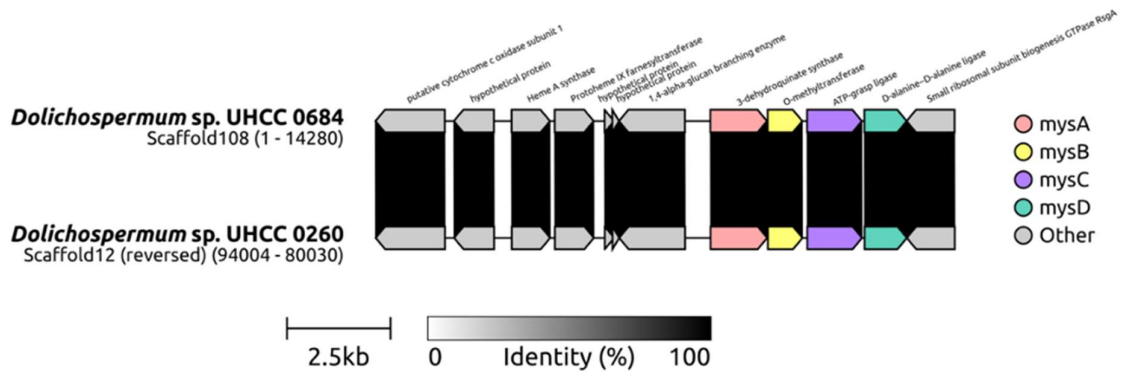

**Figure S7.** The comparison of MAA biosynthetic gene clusters from *Dolichospermum* spp. UHCC 0684 and UHCC 0260. The *mysA-mysB* genes and promoter region from *Dolichospermum* sp. UHCC 0684 and *Dolichospermum* sp. UHCC 0260 are 100 % identical at the nucleotide level.

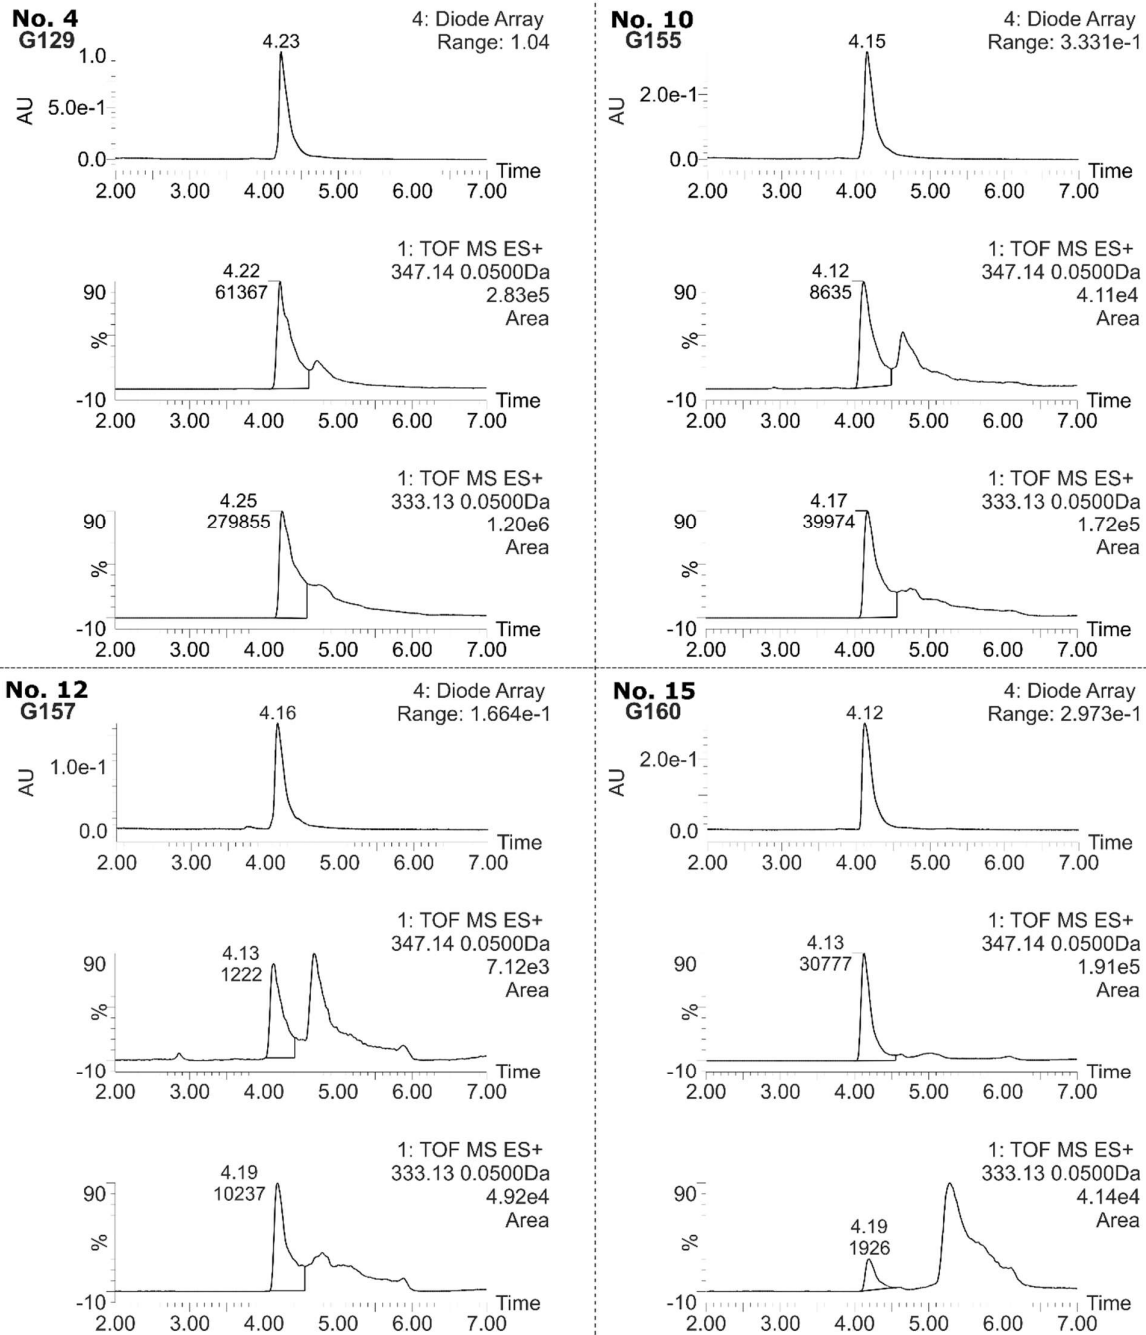

**Figure S8.** UV and MS ES<sup>+</sup> chromatograms of the high MAA producing bloom samples no. 4, 10, 12 and 15 collected during the summer of 2021. (Porphyrin-334: 347.14 Da, Shinorine: 333.13 Da)
